# Supplementary material for: A novel isophorone-based fluorescent probe for recognizing Al3+ and its bioimaging in plants
Source: Royal Society of Chemistry journal article supplement (doi:10.1039/d4ay00023d), 2024-01-01
Supplement: d4ay00023d1.pdf [file d4ay00023d1.pdf]

## Supplementary Materials

**A novel isophorone-based fluorescent probe recognizing Al<sup>3+</sup> and its bioimaging in plants**

*Yanna Zhao<sup>a\*</sup>, Yuqi Wang<sup>a</sup>, Yingying Zhang<sup>a</sup>, Xiaowei Bai<sup>a</sup>, Wentong Hou<sup>a</sup>, Yuqing  
Huang<sup>a</sup>*

<sup>a</sup>Department of Chemistry and Chemical Engineering, Shaanxi University of Science  
and Technology, Xi'an, Shaanxi 710021, China

**Table S1** Comparison of previously reported Al<sup>3+</sup> probes with functional groups similar to *YT-AI*.

| Ref.      | Porbes                                                                              | Detection Medium            | LOD     | Maximum emission wavelength | Application                   |
|-----------|-------------------------------------------------------------------------------------|-----------------------------|---------|-----------------------------|-------------------------------|
| 35        | 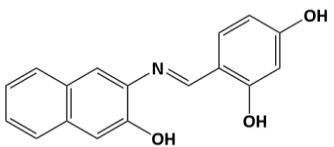   | DMF/H <sub>2</sub> O (9:1)  | 0.49 μM | 390 nm                      | Test strips                   |
| 36        |    | MeOH/H <sub>2</sub> O (1:1) | 10 μM   | 517 nm                      | Test strips<br>Cell imaging   |
| 37        |   | DMSO/H <sub>2</sub> O (9:1) | 0.22 μM | 485 nm                      | Water sample                  |
| 38        |  | MeCN/H <sub>2</sub> O (1:1) | 1.37 μM | 516 nm                      | No report                     |
| 39        |  | EtOH/H <sub>2</sub> O (9:1) | 1.62 μM | 510 nm                      | Cell imaging                  |
| This work |  | DMSO/H <sub>2</sub> O(1:1)  | 0.22 μM | 625 nm                      | Water sample<br>Plant imaging |

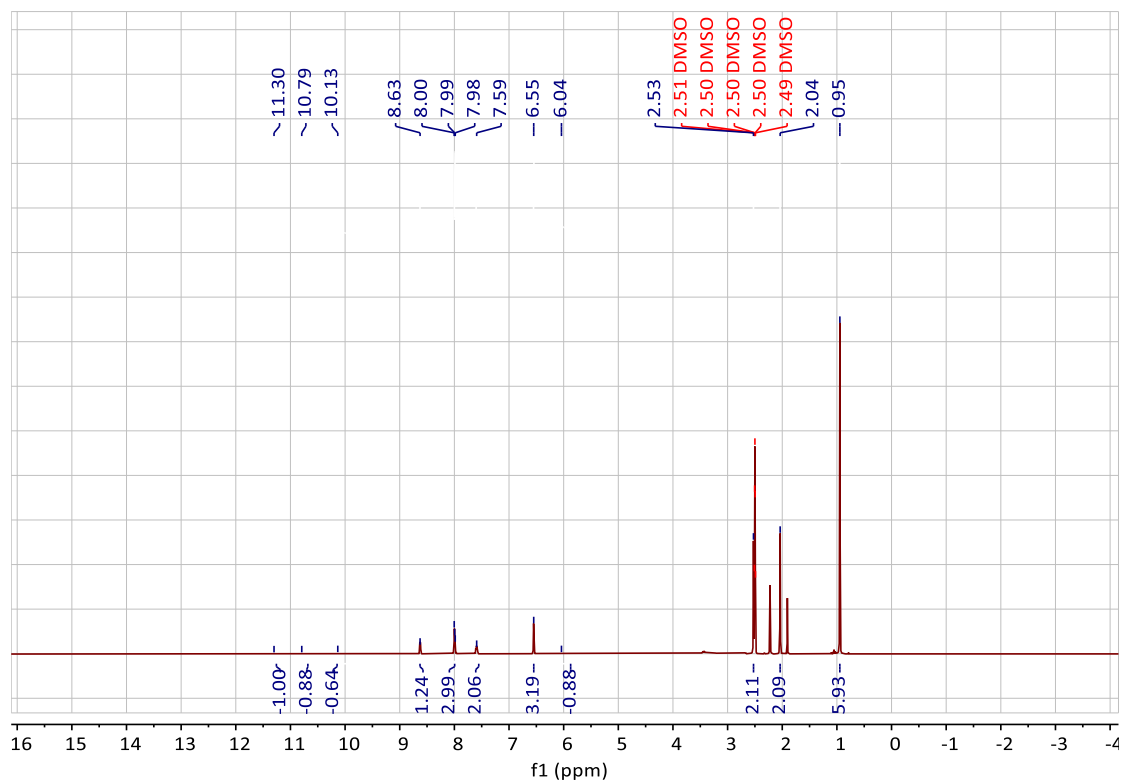

Fig. S1.  $^1\text{H}$  NMR of probe *YT-AI* in  $\text{DMSO-}d_6$ .

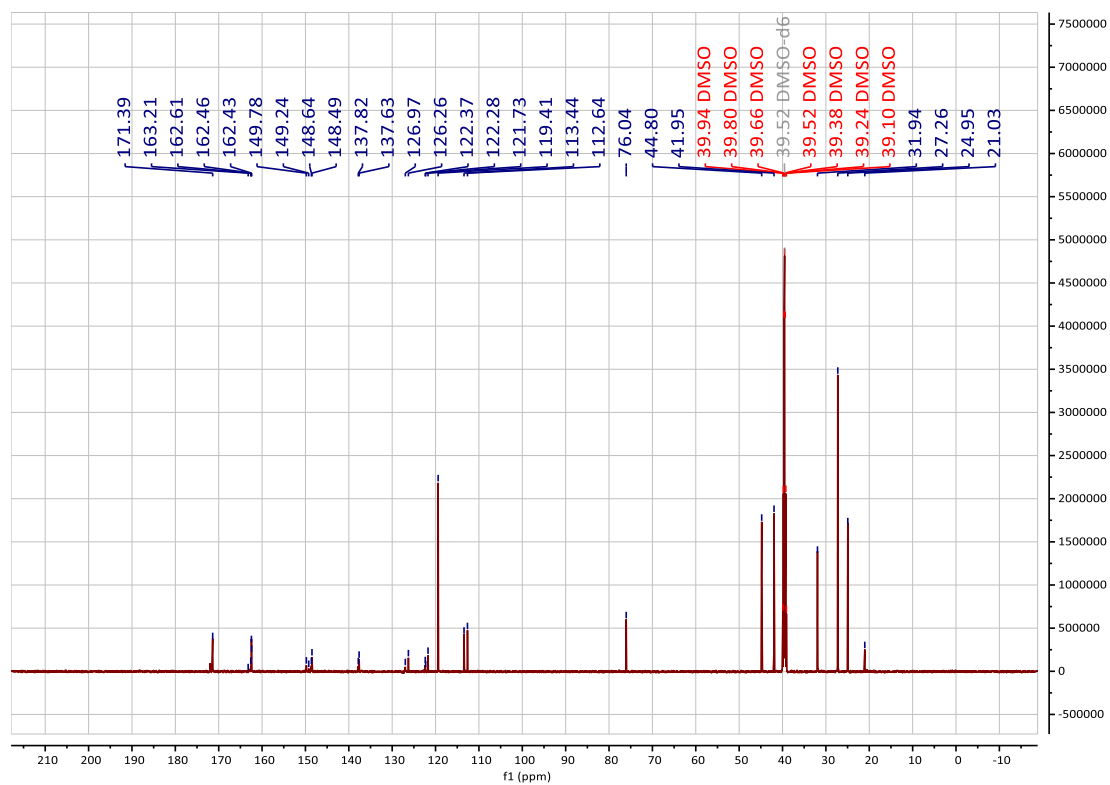

Fig. S2.  $^{13}\text{C}$  NMR of probe *YT-AI* in  $\text{DMSO-}d_6$ .

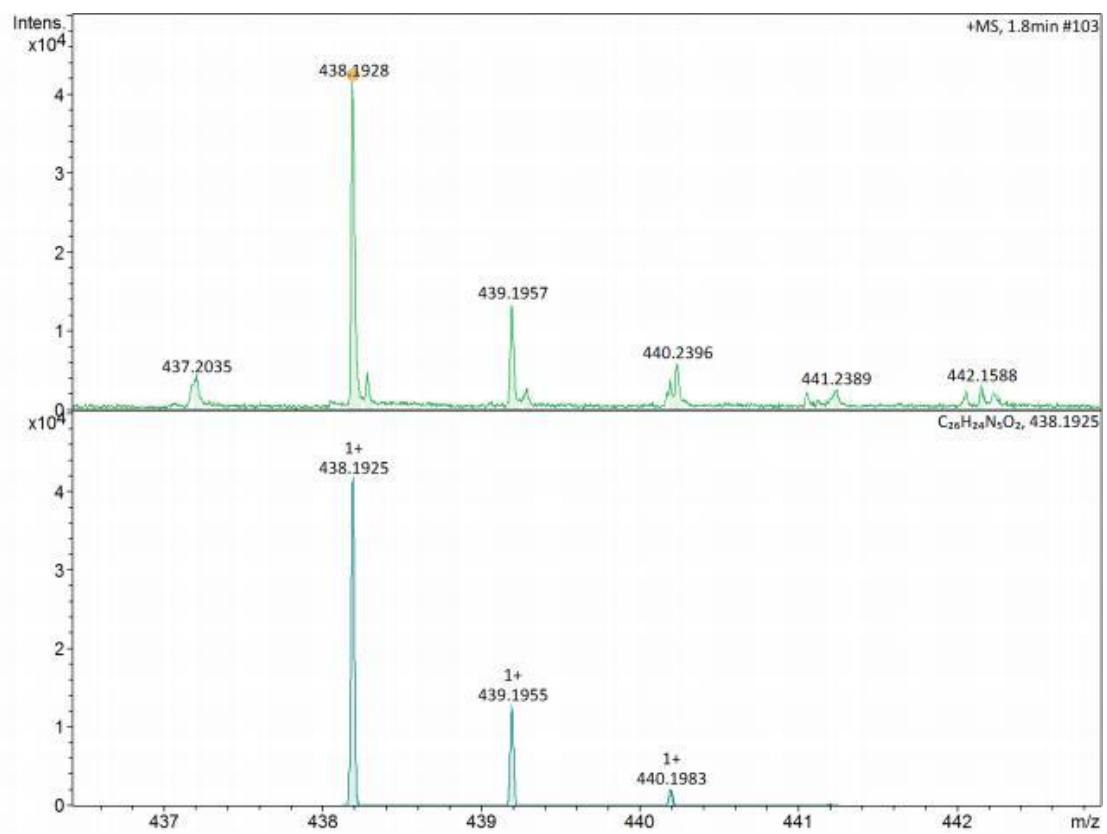

Fig. S3. HR-MS of probe *YT-AI* in  $\text{CH}_3\text{CN}$ .
